# Supplementary material
Source: Springer Nature journal article supplement (https://www.springermedizin.de/resource/supplementary/12913_2008_917_MOESM1_ESM.pdf/9536448)

Skilled birth attendants

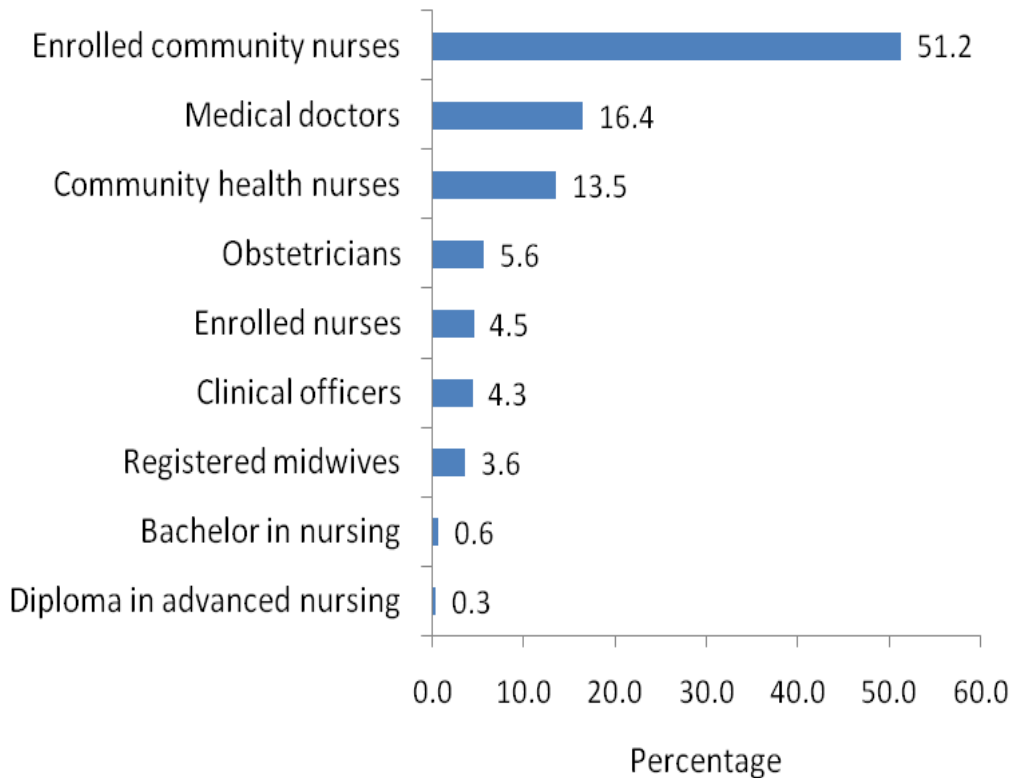

Supplement: MOESM1 [file 9536448]
